# Supplementary material
Source: publisher figshare collection journal article supplement (https://frontiersin.figshare.com/ndownloader/files/22472633)
Supplement: Supplementary file 1 [file 22472633]

>_R_contig_2;size=2
taatttacaagtatatgatttatctacacggataactttggcaattctggagctaatacgtgcattgatgcctaacttttgttgggtgcagttattagtacaaaaccatccgacttcggtcggttttgttaactctggataatgttgctaatcgcgtggtctcgtaccagcgatgtaactttcaagggactgatctatcaacttcgacattagtgtattgaactaatgtggtgttgacggataacggagaattagggttcgactccggagaaaacgcctgagaaacggcggttacatccaaggaaggcagcaggcgcgaaaattacccactctcggttcgaggaggtagtgacgtgaaatggcagaatccttttctttatggaacggattattgcaatgatgtgagtttataaaccttacaaatttgctatgagagggcaagtctggtgccagcagccgcggtaattccagctctcatactgcattgaatagttgttgcggttaaaaagctcgtagttggatcttttacgtttgcgtggtctgctcattgagtggtactactgcaacgtaatttgtatgggatttctgtattctttattgagtgcagtgtcttatacgattactttgaataaatcggagtgattcaaacaggcgtaagcttgaacgttcttgcatggaataataaaacaagacattgggcttgttttttggttttaaagaccaatgtaatgattaaaaggaacaattcgggggcattcgtattgatgcgcgagaggtgaaattcgttgaccgtatcaagacgatctaaagcgaaggcatttgccaagaatgttttcattaatcaagaacgaaagtcagaggatcg
